# Supplementary material
Source: PubMed Central journal article supplement (PMC4408281)
Supplement: supp_WNL.0000000000001474_Appendix_e-2.pdf [file supp_WNL.0000000000001474_Appendix_e-2.pdf]

**Appendix e-2: Studies included in the systematic review**

| Citation, Year                         | Study Design     | Study Location                                  | Study Population [disease cohort (seizures), symptom cohort (dizziness / vertigo), combined cohort*] | Sample Size total (n w sx of dizziness or vertigo / n w dx of seizures / n w dx of EDV) | EEG (Surface vs. IntraCranial / ictal vs. interictal) | Imaging† Fraction imaged (n_CT / n_MRI / n_mixed) | Vestibular evaluation‡ | Study Design Issues/Notes                                                        |
|----------------------------------------|------------------|-------------------------------------------------|------------------------------------------------------------------------------------------------------|-----------------------------------------------------------------------------------------|-------------------------------------------------------|---------------------------------------------------|------------------------|----------------------------------------------------------------------------------|
| Ahmed, 1980 <sup>1</sup>               | Single CR        | Neurology, hospital                             | Combined cohort                                                                                      | 1 (-/-/1)                                                                               | 1/1 (S/interictal)                                    | NA                                                | Complete               |                                                                                  |
| D'Agostino et al., 1997 <sup>2</sup> § | Retrospective CS | ENT, hospital                                   | Symptom cohort (dizziness or vertigo)                                                                | 282 (272/-/10)                                                                          | 0/282 (-/-)                                           | NA                                                | Complete               | Clinical diagnosis of epilepsy only                                              |
| Al-Asmi et al., 2005 <sup>3</sup>      | Retrospective CS | Neurology and Neurosurgery, university hospital | Disease cohort (seizures)                                                                            | 6 (-/5/1)                                                                               | 6/6 (S/interictal)                                    | 6/6 (-/6/-)                                       | None                   |                                                                                  |
| Alpers, 1960 <sup>4</sup>              | Single CR        | Neurology, university hospital                  | Combined cohort                                                                                      | 1 (-/-/1)                                                                               | 1/1 (S/interictal)                                    | NA                                                | None                   |                                                                                  |
| Barac, 1968 <sup>5</sup>               | Retrospective CS | Neurology, university hospital                  | Combined cohort                                                                                      | 5 (-/1/4)                                                                               | 5/5 (S/interictal)                                    | NA                                                | Complete               |                                                                                  |
| Barba et al., 2007 <sup>6</sup>        | Retrospective CS | Neurology and Neurosurgery, university hospital | Disease cohort (seizures)                                                                            | 80 (-/ 76/4)                                                                            | 80/80 (IC/ictal and interictal in all)                | 80/80 (-/80/-)                                    | None                   |                                                                                  |
| Bartolomei et al., 1999 <sup>7</sup>   | Single CR        | Neurology, university hospital                  | Combined cohort                                                                                      | 1 (-/-/1)                                                                               | 1/1 (S/ictal and interictal)                          | 1/1 (-/1/-)                                       | None                   |                                                                                  |
| Bartolomei et al. 2011 <sup>8</sup>    | Retrospective CS | Neurology, university hospital                  | Disease cohort (seizures)                                                                            | 17 (-/13/4)                                                                             | 17/17 (S and IC in all / ictal and interictal in all) | 17/17 (-/17/-)                                    | None                   |                                                                                  |
| Beauvais et al., 2005 <sup>9</sup>     | Retrospective CS | Neurology & Neurosurgery, university hospital   | Disease cohort (seizures)                                                                            | 11 (-/9/2)                                                                              | 11/11 (IC/ictal and interictal in all)                | 11/11 (-/11/-)                                    | None                   | Not clear if reported aura symptoms and recorded seizures were from same attacks |
| Behrman,                               | Retrospective    | Neurosurgery,                                   | Combined cohort                                                                                      | 39                                                                                      | 13/39                                                 | NA                                                | NA                     | Only clinical                                                                    |

Appendix e-2: Details of Studies included in the Systematic Review

|                                        |                  |                                                  |                                       |                 |                                          |                 |          |                                                                                          |
|----------------------------------------|------------------|--------------------------------------------------|---------------------------------------|-----------------|------------------------------------------|-----------------|----------|------------------------------------------------------------------------------------------|
| 1955 <sup>10</sup>                     | CS               | hospital                                         |                                       | (-/39)          | (S/interictal)                           |                 |          | diagnosis of epilepsy in 26 /39 cases. Numbers and extent of vestibular testing unclear. |
| Behrman and Wyke, 1958 <sup>11</sup> § | Single CR        | Neurosurgery, hospital                           | Combined cohort                       | 1 (-/1)         | 1/1 (S/ictal and interictal)             | NA              | Complete |                                                                                          |
| Best et al., 2010 <sup>12</sup> §      | Single CR        | Neurology, university hospital                   | Combined cohort                       | 1 (-/1)         | 1/1 (IC/ictal and interictal)            | 1/1 (-/1-)      | Partial  |                                                                                          |
| Beun et al., 1984 <sup>13</sup> §      | Retrospective CS | Neurology, hospital                              | Disease cohort (seizures)             | 4 (-/3/1)       | 4/4 (S/ictal and interictal)             | 3/4 (3/-/-)     | None     |                                                                                          |
| Blayney and Colman, 1984 <sup>14</sup> | Retrospective CS | ENT, university hospital                         | Symptom cohort (dizziness or vertigo) | 27 (26-/1)      | NA                                       | NA              | Complete | Clinical diagnosis of epilepsy only. Numbers for imaging unclear.                        |
| Buckley, 1963 <sup>15</sup>            | Single CR        | Psychiatry, university hospital                  | Combined cohort                       | 1 (-/1)         | 1/1 (S/ictal and interictal)             | NA              | Complete |                                                                                          |
| Calhoun et al., 1972 <sup>16</sup> §   | Retrospective CS | Neurosurgery and Psychiatry, university hospital | Disease cohort (seizures)             | 6 (-/1/5)       | 6/6 (S in all, IC in 2 /interictal)      | NA              | None     |                                                                                          |
| Cantor, 1971 <sup>17</sup>             | Single CR        | Neurology, university hospital                   | Combined cohort                       | 1 (-/1)         | 1/1 (S/ictal and interictal)             | NA              | Complete |                                                                                          |
| Choung et al., 2003 <sup>18</sup>      | Retrospective CS | ENT, university hospital                         | Symptom cohort (dizziness or vertigo) | 55 (54-/1)      | 7/55 (S/interictal)                      | 16/55 (5/11/-)  | Complete |                                                                                          |
| Currie et al., 1971 <sup>19</sup> §    | Retrospective CS | Neurology and neurosurgery, university hospital  | Disease cohort (seizures)             | 666 (-/540/126) | 666/666 (S/interictal)                   | NA              | None     |                                                                                          |
| Desai, 1968 <sup>20</sup>              | Retrospective CS | Neurosurgery, hospital                           | Disease cohort (seizures)             | 52 (-/34/18)    | NA                                       | NA              | None     | Clinical diagnosis of epilepsy only                                                      |
| Dubeau et al., 1995 <sup>21</sup>      | Retrospective CS | Neurology, university hospital                   | Disease cohort (seizures)             | 28 (-/25/3)     | 28/28 (S/ictal in 17, interictal in all) | 28/28 (22/28/-) | None     |                                                                                          |
| El-Shafie 2013 <sup>22</sup>           | Single CR        | General medicine,                                | Disease cohort (seizures)             | 1 (-/1)         | 1/1 (S/interictal)                       | 0/1 (-/-/-)     | None     |                                                                                          |

Appendix e-2: Details of Studies included in the Systematic Review

|                                           |                  |                                                  |                                       |                  |                                               |                |          |                                                   |
|-------------------------------------------|------------------|--------------------------------------------------|---------------------------------------|------------------|-----------------------------------------------|----------------|----------|---------------------------------------------------|
|                                           |                  | university hospital                              |                                       |                  |                                               |                |          |                                                   |
| Erbayat Altay et al., 2005 <sup>23</sup>  | Single CR        | Neurology and Pediatrics, university hospital    | Combined cohort                       | 1 (-/-/1)        | 1/1 (S/ictal and interictal)                  | 1/1 (-/1/-)    | None     |                                                   |
| Erbek et al., 2006 <sup>24</sup>          | Retrospective CS | Pediatric ENT, university hospital               | Symptom cohort (dizziness or vertigo) | 50 (47/-/3)      | NA                                            | 1/50 (1/-/-)   | Complete | Unclear how many patients received an EEG or cMRI |
| Erkwoh et al., 1990 <sup>25</sup>         | Retrospective CS | Psychiatry, university hospital                  | Disease cohort (seizures)             | 1563 (-/1517/46) | 1563/1563 (S/interictal)                      | NA             | None     |                                                   |
| Eviatar, 1981 <sup>26</sup>               | Retrospective CS | Pediatric neurology, university hospital         | Symptom cohort (dizziness or vertigo) | 20 (15/-/5)      | 20/20 (S/interictal)                          | NA             | Complete |                                                   |
| Eviatar and Eviatar, 1977 <sup>27</sup>   | Retrospective CS | Pediatric neurology and ENG, university hospital | Symptom cohort (dizziness or vertigo) | 50 (25/-/25)     | 50/50 (S/interictal)                          | NA             | Complete |                                                   |
| Eviatar et al., 1986 <sup>28</sup>        | Retrospective CS | Pediatric Neurology, university hospital         | Symptom cohort (dizziness or vertigo) | 22 (18/-/4)      | 22/22 (S/interictal)                          | 22/22 (22/-/-) | Complete |                                                   |
| Fried et al., 1995 <sup>29</sup>          | Retrospective CS | Neurosurgery and Neurology, university hospital  | Disease cohort (seizures)             | 90 (-/76/14)     | 90/90 (S or IC, numbers unclear / interictal) | 90/90 (-/-/90) | None     |                                                   |
| Furman et al. 1990 <sup>30</sup>          | Single CR        | ENT and Neurology, university hospital           | Combined cohort                       | 1 (-/-/1)        | 1/1 (S/ictal and interictal)                  | 1/1 (-/1/-)    | Complete |                                                   |
| Gallinat et al., 2003 <sup>31</sup>       | Single CR        | Psychiatry, university hospital                  | Combined cohort                       | 1 (-/-/1)        | 1/1 (S/interictal)                            | 1/1 (-/1/-)    | None     |                                                   |
| Gandelman et al., 2006 <sup>32</sup>      | Single CR        | Neurology, university hospital                   | Combined cohort                       | 1 (-/-/1)        | 1/1 (S/interictal)                            | 1/1 (-/1/-)    | None     |                                                   |
| Garcia-Herrero et al., 1998 <sup>33</sup> | Single CR        | Neurology, university hospital                   | Combined cohort                       | 1 (-/-/1)        | 1/1 (S/ictal and interictal)                  | 1/1 (-/1/-)    | None     |                                                   |
| Gowers,                                   | Retrospective    | Neurology,                                       | Disease cohort                        | 1000             | NA                                            | NA             | None     | Clinical diagnosis of                             |

Appendix e-2: Details of Studies included in the Systematic Review

|                                         |                          |                                                 |                                               |                |                                                            |                   |          |                                                                                                                                           |
|-----------------------------------------|--------------------------|-------------------------------------------------|-----------------------------------------------|----------------|------------------------------------------------------------|-------------------|----------|-------------------------------------------------------------------------------------------------------------------------------------------|
| 1881 <sup>34</sup> §                    | CS                       | university hospital                             | (seizures)                                    | (-/910/90)     |                                                            |                   |          | epilepsy only                                                                                                                             |
| Guclu et al., 2010 <sup>35</sup>        | Single CR                | Neurosurgery, university hospital               | Combined cohort                               | 1 (-/-/1)      | NA                                                         | 1/1 (-/1/-)       | None     | Clinical diagnosis of epilepsy only                                                                                                       |
| Herr et al., 1989 <sup>36</sup>         | Retrospective CS         | Emergency medicine, university hospital         | Symptom cohort (dizziness or vertigo)         | 125 (122/-/3)  | 3/125 (S/interictal)                                       | NA                | None     |                                                                                                                                           |
| Heuser et al., 2011 <sup>37</sup>       | Retrospective CS         | Neurology, university hospital                  | Disease cohort (seizures)                     | 207 (-/190/17) | 207 / 207 (S/interictal)                                   | 207/207 (-/207/-) | None     |                                                                                                                                           |
| Hewett et al., 2011 <sup>38</sup>       | Retrospective CS         | Neurology, university hospital                  | Combined cohort                               | 14 (-/-/14)    | 14/14 (S in all / interictal in all, ictal in 1)           | 14/14 (-/14/-)    | None     |                                                                                                                                           |
| Hochman, 1983 <sup>39</sup> §           | Single CR                | Neurology, university hospital                  | Combined cohort                               | 1 (-/-/1)      | 1/1 (S/interictal)                                         | 1/1 (1/-/-)       | None     |                                                                                                                                           |
| Hsieh 1996 <sup>40</sup>                | Single CR                | Neurology, hospital                             | Disease cohort (seizures)                     | 1 (-/-/1)      | 1/1 (S/interictal)                                         | 1/1 (-/1/-)       | None     |                                                                                                                                           |
| Hughes and Drachman, 1977 <sup>41</sup> | Retrospective CS         | Neurology, university hospital                  | 2 cohorts (symptom cohort and disease cohort) | 145 (97/16/32) | 145/145 (S/interictal)                                     | NA                | Partial  |                                                                                                                                           |
| Isaradisakul et al., 2010 <sup>42</sup> | Retrospective CS         | ENT, university hospital                        | Symptom cohort (dizziness or vertigo)         | 547 (546/-/1)  | 1/547 (S/interictal)                                       | NA                | Partial  | Unclear which patients received which vestibular tests                                                                                    |
| Janszky et al., 2004 <sup>43</sup>      | Prospective CS           | Psychiatry and Neurology, university hospital   | Disease cohort (seizures)                     | 113 (-/96/17)  | NA                                                         | 113/113 (-/113/-) | None     | There is no information about EEG recordings and associated findings reported                                                             |
| Kim et al., 2004 <sup>44</sup>          | CS, likely retrospective | Neurology and Neurosurgery, university hospital | Disease cohort (seizures)                     | 40 (-/36/4)    | 40/40 (S in all and IC in 27 /ictal and interictal in all) | 40/40 (-/40/-)    | None     | Although ictal EEGs were recorded, it is unclear if aura symptoms reported were from seizures that were confirmed by ictal EEG recordings |
| Kim et al., 2013 <sup>45</sup>          | Single CR                | Pediatric and ENT university hospital           | Combined cohort                               | 1 (-/-/1)      | 1/1 (S/ictal and interictal)                               | 1/1 (-/1/-)       | Complete |                                                                                                                                           |

|                                        |                  |                                |                                       |                   |                                                       |                 |          |                                     |
|----------------------------------------|------------------|--------------------------------|---------------------------------------|-------------------|-------------------------------------------------------|-----------------|----------|-------------------------------------|
| Kluge et al., 2000 <sup>46</sup>       | Single CR        | Neurology, university hospital | Combined cohort                       | 1 (-/-/1)         | 1/1 (S/ictal and interictal)                          | 1/1 (-/1/-)     | None     |                                     |
| Kocher et al., 1999 <sup>47</sup>      | Single CR        | Neurology, hospital            | Combined cohort                       | 1 (-/-/1)         | 1/1 (S/ictal and interictal)                          | 1/1 (-/1/-)     | None     |                                     |
| Kogeorgos et al., 1981 <sup>48</sup>   | Retrospective CS | Neurology, university hospital | Combined cohort                       | 30 (-/-/30)       | 30/30 (S/interictal)                                  | 5/30 (-/-/5)    | Complete |                                     |
| Lennox and Cobb, 1933 <sup>49</sup> §  | Retrospective CS | Neurology, university hospital | Disease cohort (seizures)             | 1527 (-/1400/127) | NA                                                    | NA              | None     | Clinical diagnosis of epilepsy only |
| Levy and O'Leary, 1947 <sup>50</sup> § | Retrospective CS | Neurology, university hospital | Symptom cohort (dizziness or vertigo) | 8 (7/-/1)         | 2/8 (S/interictal)                                    | NA              | Complete |                                     |
| Lopez et al., 2010 <sup>51</sup>       | Single CR        | Neurology, university hospital | Combined cohort                       | 1 (-/-/1)         | 1/1 (S/interictal)                                    | 1/1 (-/1/-)     | None     |                                     |
| Macrae, 1960 <sup>52</sup>             | Retrospective CS | Neurology, university hospital | Symptom cohort (dizziness or vertigo) | 400 (356/-/44)    | NA                                                    | NA              | Complete | Clinical diagnosis of epilepsy only |
| Maillard et al., 2004 <sup>53</sup>    | Retrospective CS | Neurology, university hospital | Disease cohort (seizures)             | 55 (-/49/6)       | 55/55 (S and IC in all / ictal and interictal in all) | 55/55 (-/55/-)  | None     |                                     |
| Michelucci et al., 2004 <sup>54</sup>  | Prospective CS   | Neurology, university hospital | Disease cohort (seizures)             | 3 (-/1/2)         | 3/3 (S/ictal in 1, interictal in all)                 | 3/3 (1/2/-)     | None     |                                     |
| Michelucci et al., 2013 <sup>55</sup>  | Retrospective CS | Neurology, university hospital | Disease cohort (seizures)             | 127 (-/110/17)    | 77/127 (S in all/ ictal in 1, interictal in 77)       | 66/127 (-/66/-) | None     |                                     |
| Montavont et al., 2013 <sup>56</sup>   | Retrospective CS | Neurology, university hospital | Disease cohort (seizures)             | 4 (-/1/3)         | 4/4 (S and IC in all/ ictal and interictal in all)    | 4/4 (-/4/-)     | None     |                                     |
| Nakken et al., 2009 <sup>57</sup>      | Prospective CS   | Neurology, university hospital | Disease cohort (seizures)             | 1897 (-/1822/75)  | 1897/1897 (S/interictal)                              | NA              | None     |                                     |
| Navi et al.,                           | Retrospective    | Neurology,                     | Symptom cohort                        | 907               | NA                                                    | 356/907         | Partial  |                                     |

Appendix e-2: Details of Studies included in the Systematic Review

|                                                 |                                  |                                                         |                                       |               |                                                       |                    |          |                                      |
|-------------------------------------------------|----------------------------------|---------------------------------------------------------|---------------------------------------|---------------|-------------------------------------------------------|--------------------|----------|--------------------------------------|
| 2012 <sup>58</sup>                              | CS                               | university hospital                                     | (dizziness or vertigo)                | (903/-/4)     |                                                       | (252/104/-)        |          |                                      |
| Nicita et al., 2010 <sup>59</sup>               | Single CR                        | Pediatric Neurology, university hospital                | Combined cohort                       | 1 (-/-/1)     | 1/1 (S/ictal and interictal)                          | 1/1 (-/1/-)        | Complete |                                      |
| Niedermeyer and Hinchcliffe, 1965 <sup>60</sup> | Prospective CS                   | Psychiatry and ENT, university hospital                 | Symptom cohort (dizziness or vertigo) | 70 (70/-/-)   | 70/70 (S/interictal)                                  | NA                 | Partial  |                                      |
| Nsamba, 1972 <sup>61</sup>                      | Retrospective CS                 | ENT, hospital                                           | Symptom cohort (dizziness or vertigo) | 100 (95/-/5)  | NA                                                    | NA                 | Complete | Clinical diagnosis of epilepsy only  |
| Nyame 1994 <sup>62</sup>                        | CS, likely retrospective         | Neurology, university hospital                          | Disease cohort (seizures)             | 80 (-/68/12)  | 80/80 (S/interictal)                                  | 0/80 (-/-/-)       | None     |                                      |
| Ojala et al., 1988 <sup>63</sup>                | Prospective CS                   | Neurology, university hospital                          | Symptom cohort (dizziness or vertigo) | 142 (139/-/3) | 142/142 (S/interictal)                                | 117/142 (56/32/29) | Partial  |                                      |
| Palmini and Gloor 1992 <sup>64</sup>            | Prospective and retrospective CS | Neurology, university hospital                          | Disease cohort (seizures)             | 179 (-/172/7) | 179/179 (S in 179 and IC in 41 /ictal and interictal) | 105/179 (33/72/-)  | None     |                                      |
| Pedersen and Jepsen, 1956 <sup>65</sup>         | Retrospective CS                 | ENT and Neurology, university hospital                  | Combined cohort                       | 22 (-/-/22)   | 22/22 (S/interictal)                                  | NA                 | Complete |                                      |
| Peppercorn et al., 1989 <sup>66</sup>           | Retrospective CS                 | Neurology and medicine, university hospital             | Disease cohort (seizures)             | 10 (-/8/2)    | 10/10 (S/interictal)                                  | 10/10 (10/-/-)     | None     |                                      |
| Pisano et al., 2005 <sup>67</sup>               | Retrospective CS                 | Pediatric Neurology and Psychiatry, university hospital | Disease cohort (seizures)             | 9 (-/6/3)     | 5/9 (S/interictal)                                    | 5/9 (3/2/-)        | None     |                                      |
| Ravid et al., 2003 <sup>68</sup> §              | Retrospective CS                 | Pediatric neurology, hospital                           | Symptom cohort (dizziness or vertigo) | 62 (60/-/2)   | 12/62 (S/interictal)                                  | 55/62 (-/-/55)     | Partial  |                                      |
| Ravindran, 1978 <sup>69</sup>                   | Single CR                        | Neurology, private practice                             | Symptom cohort (dizziness or vertigo) | 1 (-/-/1)     | 1/1 (S/interictal)                                    | 1/1 (1/-/-)        | None     | Correct study location needs update! |
| Salanova et                                     | Retrospective                    | Neurology and                                           | Disease cohort                        | 42            | 39/42                                                 | 15/42              | None     |                                      |

Appendix e-2: Details of Studies included in the Systematic Review

|                                          |                  |                                                  |                           |               |                                                    |                |                         |                                                       |
|------------------------------------------|------------------|--------------------------------------------------|---------------------------|---------------|----------------------------------------------------|----------------|-------------------------|-------------------------------------------------------|
| al., 1992 <sup>70</sup> §                | CS               | Neurosurgery, university hospital                | (seizures)                | (-/41/1)      | (S in all, IC in 6/ictal in 26, interictal in all) | (8/7/-)        |                         |                                                       |
| Salanova et al. 1995 <sup>71</sup>       | Retrospective CS | Neurology and Neurosurgery, university hospital  | Disease cohort (seizures) | 82 (-/73/9)   | 66/82 (S/ictal in 36, interictal in 66)            | 79/82 (-/-/79) | None                    |                                                       |
| Schneider et al., 1968 <sup>72</sup> §   | Retrospective CS | Neurosurgery and psychiatry, university hospital | Disease cohort (seizures) | 46 (-/40/6)   | 6/46 (S in all, IC in 3 /interictal)               | NA             | None                    |                                                       |
| Shrestha 2013 <sup>73</sup>              | Single CR        | Neurosurgery, university hospital                | Disease cohort (seizures) | 1 (-/-/1)     | 1/1 (S/interictal)                                 | 1/1 (-/1/-)    | None                    | Clinical diagnosis of epilepsy only as EEG was normal |
| Smith, 1960 <sup>74</sup> §              | Retrospective CS | Neurology, university hospital                   | Combined cohort           | 120 (-/-/120) | NA                                                 | NA             | None                    | Clinical diagnosis of epilepsy only                   |
| Soslow, 1984 <sup>75</sup>               | Single CR        | Emergency medicine, hospital                     | Combined cohort           | 1 (-/-/1)     | 1/1 (S/interictal)                                 | 1/1 (1/-/-)    | None                    |                                                       |
| Specchio et al., 2011 <sup>76</sup>      | Retrospective CS | Neurology, university hospital                   | Disease cohort (seizures) | 4 (-/2/2)     | 4 / 4 (S/interictal)                               | 2/4 (-/2/-)    | Partial in 1, none in 3 |                                                       |
| Tartara et al., 1984 <sup>77</sup>       | Retrospective CS | Neurology, university hospital                   | Disease cohort (seizures) | 29 (-/16/13)  | 29/29 (S/interictal)                               | NA             | Complete                |                                                       |
| Taylor and Lochery, 1987 <sup>78</sup> § | Retrospective CS | Psychiatry, university hospital                  | Disease cohort (seizures) | 88 (-/83/5)   | NA                                                 | NA             | None                    | Clinical diagnosis of epilepsy only                   |
| Thibodeau et al., 1997 <sup>79</sup>     | Single CR        | Emergency medicine, hospital                     | Combined cohort           | 1 (-/-/1)     | 1/1 (S/ictal and interictal)                       | 0/1 (-/-/-)    | None                    |                                                       |
| Weber et al., 2006 <sup>80</sup> §       | Retrospective CS | Neurology, university hospital                   | Disease cohort (seizures) | 2 (-/-/2)     | 2/2 (S/ictal and interictal)                       | 2/2 (-/2/-)    | None                    |                                                       |
| Weintraub and Smith, 1969 <sup>81</sup>  | Retrospective CS | Neurology, university hospital                   | Combined cohort           | 8 (-/-/8)     | 8/8 (S/interictal)                                 | NA             | None                    |                                                       |
| Wiest et al., 2004 <sup>82</sup>         | Single CR        | Neurology and Neurosurgery, university hospital  | Combined cohort           | 1 (-/-/1)     | 1/1 (IC/ictal and interictal)                      | 1/1 (-/1/-)    | Complete                |                                                       |

|                                    |                  |                                                  |                           |             |                      |              |      |  |
|------------------------------------|------------------|--------------------------------------------------|---------------------------|-------------|----------------------|--------------|------|--|
| Winawer et al., 2000 <sup>83</sup> | Retrospective CS | Public health and Neurology, university hospital | Disease cohort (seizures) | 11 (-/10/1) | 10/11 (S/interictal) | 3/11 (3/-/-) | None |  |
|------------------------------------|------------------|--------------------------------------------------|---------------------------|-------------|----------------------|--------------|------|--|

\* Studies assigned to the combined cohort included patients only if both a diagnosis of seizures and a complaint of dizziness or vertigo was present.

† “Mixed” indicates that patients received either cMRI, CCT or SPECT but that individual numbers were not clear.

‡ Type of vestibular evaluation: complete = evaluation by a subspecialist neuro-otologist or specific description of testing that includes Frenzel goggles, positional testing, and calorics or head impulse testing of the vestibulo-ocular reflex; partial = any mentioning of neuro-otological testing short of “complete”; none = no mentioning of any testing for vestibular disorders

§ Obtained through hand search of the reference lists of selected articles.

Abbreviations: CS = case series; CR = case report; cCT = cranial computer tomography; cMRI = cranial magnetic resonance imaging; ED = emergency department; EDV = epileptic dizziness or vertigo; NA = not applicable

### References:

1. Ahmed I. Epilepsia tornado. J Kans Med Soc 1980;81:466-467.
2. D'Agostino R, Tarantino V, Melagrana A, Taborelli G. Otoneurologic evaluation of child vertigo. Int J Pediatr Otorhinolaryngol 1997;40:133-139.
3. Al-Asmi A, Jansen AC, Badhwar A, et al. Familial temporal lobe epilepsy as a presenting feature of choreoacanthocytosis. Epilepsia 2005;46:1256-1263.
4. Alpers BJ. Vertiginous epilepsy. Laryngoscope 1960;70:631-637.
5. Barac B. Vertiginous epileptic attacks and so-called "vestibulogenic seizures. Epilepsia 1968;9:137-144.
6. Barba C, Barbati G, Minotti L, Hoffmann D, Kahane P. Ictal clinical and scalp-EEG findings differentiating temporal lobe epilepsies from temporal 'plus' epilepsies. Brain : a journal of neurology 2007;130:1957-1967.
7. Bartolomei F, Regis J, Donnet A, Gastaut JL. Development of focal chronic epilepsy following focal status epilepticus in adult patients. Neurophysiol Clin 1999;29:271-276.
8. Bartolomei F, Gavaret M, Hewett R, et al. Neural networks underlying parietal lobe seizures: a quantified study from intracerebral recordings. Epilepsy Res 2011;93:164-176.
9. Beauvais K, Biraben A, Seigneuret E, Saikali S, Scarabin JM. Subjective signs in premotor epilepsy: confirmation by stereo-electroencephalography. Epileptic Disord 2005;7:347-354.
10. Behrman S. Vestibular epilepsy. Brain 1955;78:471-486.
11. Behrman S, Wyke BD. Vestibulogenic seizures. Brain 1958;81:529-541.
12. Best C, Stefan H, Hopfengaertner R, Dieterich M. Effects of electrical stimulation in vestibular cortex areas in humans. Journal of the neurological sciences 2010;290:157-162.
13. Beun AM, Beintema DJ, Binnie CD, Debets RM, Overweg J, Van Heycop ten Ham MW. Epileptic nystagmus. Epilepsia 1984;25:609-614.



14. Blayney AW, Colman BH. Dizziness in childhood. *Clin Otolaryngol Allied Sci* 1984;9:77-85.
15. Buckley RE. Vertiginous Temporal Lobe Seizures Stimulated by Functional Hyperinsulinism. *JAMA* 1963;186:726-727.
16. Calhoun AH, Crosby EC, Kooi KA, Schneider RC. Cortical and subcortical lesions evoking vestibular symptoms. *Clinical electroencephalography* 1972;3:6-37.
17. Cantor FK. Vestibular-temporal lobe connections demonstrated by induced seizures. *Neurology* 1971;21:507-516.
18. Choung YH, Park K, Moon SK, Kim CH, Ryu SJ. Various causes and clinical characteristics in vertigo in children with normal eardrums. *Int J Pediatr Otorhinolaryngol* 2003;67:889-894.
19. Currie S, Heathfield KW, Henson RA, Scott DF. Clinical course and prognosis of temporal lobe epilepsy. A survey of 666 patients. *Brain : a journal of neurology* 1971;94:173-190.
20. Desai AD. Psychomotor epilepsy. *Neurol India* 1968;16:1-8.
21. Dubeau F, Tampieri D, Lee N, et al. Periventricular and subcortical nodular heterotopia. A study of 33 patients. *Brain : a journal of neurology* 1995;118 (Pt 5):1273-1287.
22. El-Shafie KT. Palpitations caused by a Seizure with Autonomic Features. *Sultan Qaboos University medical journal* 2013;13:E339-341.
23. Erbayat Altay E, Serdaroglu A, Gucuyener K, Bilir E, Karabacak NI, Thio LL. Rotational vestibular epilepsy from the temporo-parieto-occipital junction. *Neurology* 2005;65:1675-1676.
24. Erbek SH, Erbek SS, Yilmaz I, et al. Vertigo in childhood: a clinical experience. *Int J Pediatr Otorhinolaryngol* 2006;70:1547-1554.
25. Erkwow R. Psychopathology of vestibular auras. *Psychopathology* 1990;23:129-135.
26. Eviatar L. Vestibular testing in basilar artery migraine. *Annals of neurology* 1981;9:126-130.
27. Eviatar L, Eviatar A. Vertigo in children: differential diagnosis and treatment. *Pediatrics* 1977;59:833-838.
28. Eviatar L, Bergrau M, Randel RM. Post-traumatic vertigo in children: a diagnostic approach. *Pediatr Neurol* 1986;2:61-66.
29. Fried I, Spencer DD, Spencer SS. The anatomy of epileptic auras: focal pathology and surgical outcome. *J Neurosurg* 1995;83:60-66.
30. Furman JM, Crumrine PK, Reinmuth OM. Epileptic nystagmus. *Ann Neurol* 1990;27:686-688.
31. Gallinat J, Stotz-Ingenlath G, Lang UE, Hegerl U. Panic attacks, spike-wave activity, and limbic dysfunction. A case report. *Pharmacopsychiatry* 2003;36:123-126.
32. Gandelman-Marton R, Segev Y, Theitler J, Rabey JM, Pollak L. Palpitations: could they be neurogenic? A case report. *The neurologist* 2006;12:160-162.
33. Garcia-Herrero D, Fernandez-Torre JL, Barrasa J, Calleja J, Pascual J. Abdominal epilepsy in an adolescent with bilateral perisylvian polymicrogyria. *Epilepsia* 1998;39:1370-1374.
34. Gowers WR. *Epilepsy and other chronic convulsive diseases: their causes, symptoms, & treatment.* London, UK: J. & A. Churchill, 1881.
35. Guclu B, Sindou M. Reconstruction of vein of Labbe in temporo-occipital meningioma invading transverse sinus: technical report. *Acta Neurochir (Wien)* 2010;152:941-945; discussion 945.
36. Herr RD, Zun L, Mathews JJ. A directed approach to the dizzy patient. *Annals of emergency medicine* 1989;18:664-672.
37. Heuser K, Cvancarova M, Gjerstad L, Tauboll E. Is Temporal Lobe Epilepsy with childhood febrile seizures a distinctive entity? A comparative study. *Seizure* 2011;20:163-166.
38. Hewett R, Guye M, Gavaret M, Bartolomei F. Benign temporo-parieto-occipital junction epilepsy with vestibular disturbance: an underrecognized form of epilepsy? *Epilepsy Behav* 2011;21:412-416.

39. Hochman MS. Rotatory seizures associated with frontal lobe malignant neoplasm: a case report. *Epilepsia* 1983;24:11-14.
40. Hsieh PF. Tourette syndrome and complex partial epilepsy--a case report. *Kaohsiung J Med Sci* 1996;12:437-440.
41. Hughes JR, Drachman DA. Dizziness, epilepsy and the EEG. *Dis Nerv Syst* 1977;38:431-435.
42. Isaradisaiikul S, Navacharoen N, Hanprasertpong C, Kangsanarak J, Panyathong R. Causes and time-course of vertigo in an ear, nose, and throat clinic. *Eur Arch Otorhinolaryngol* 2010;267:1837-1841.
43. Janszky J, Szucs A, Rasonyi G, et al. Intentional seizure interruption may decrease the seizure frequency in drug-resistant temporal lobe epilepsy. *Seizure* 2004;13:156-160.
44. Kim DW, Lee SK, Yun CH, et al. Parietal lobe epilepsy: the semiology, yield of diagnostic workup, and surgical outcome. *Epilepsia* 2004;45:641-649.
45. Kim KS, Kim YH, Hwang Y, Kang B, Kim DH, Kwon YS. Epileptic nystagmus and vertigo associated with bilateral temporal and frontal lobe epilepsy. *Clinical and experimental otorhinolaryngology* 2013;6:259-262.
46. Kluge M, Beyenburg S, Fernandez G, Elger CE. Epileptic vertigo: evidence for vestibular representation in human frontal cortex. *Neurology* 2000;55:1906-1908.
47. Kocher L, Rambaud L, Rousselle C, Mottolese C, Ryvlin P, Gonnaud PM. Painful seizures with allodynia in an 11-year-old boy. *Dev Med Child Neurol* 1999;41:704-707.
48. Kogeorgos J, Scott DF, Swash M. Epileptic dizziness. *Br Med J (Clin Res Ed)* 1981;282:687-689.
49. Lennox WG, Cobb S. Epilepsy; Aura in epilepsy: a statistical review of 1359 cases. *Arch Neurol Psychiatry* 1933;30:374-387.
50. Levy I, O'Leary JL. Incidence of vertigo in neurological conditions. *Ann Otol Rhinol Laryngol* 1947;56:557-575.
51. Lopez C, Heydrich L, Seeck M, Blanke O. Abnormal self-location and vestibular vertigo in a patient with right frontal lobe epilepsy. *Epilepsy Behav* 2010;17:289-292.
52. Macrae D. The neurologic aspects of vertigo: analysis of 400 cases. *Calif Med* 1960;92:255-259.
53. Maillard L, Vignal JP, Gavaret M, et al. Semiologic and electrophysiologic correlations in temporal lobe seizure subtypes. *Epilepsia* 2004;45:1590-1599.
54. Michelucci R, Gardella E, de Haan GJ, et al. Telephone-induced seizures: a new type of reflex epilepsy. *Epilepsia* 2004;45:280-283.
55. Michelucci R, Pasini E, Malacrida S, et al. Low penetrance of autosomal dominant lateral temporal epilepsy in Italian families without LGII mutations. *Epilepsia* 2013;54:1288-1297.
56. Montavont A, Kahane P, Catenoix H, et al. Hypermotor seizures in lateral and mesial parietal epilepsy. *Epilepsy Behav* 2013;28:408-412.
57. Nakken KO, Solaas MH, Kjeldsen MJ, Friis ML, Pellock JM, Corey LA. The occurrence and characteristics of auras in a large epilepsy cohort. *Acta neurologica Scandinavica* 2009;119:88-93.
58. Navi BB, Kamel H, Shah MP, et al. Rate and predictors of serious neurologic causes of dizziness in the emergency department. *Mayo Clinic proceedings* 2012;87:1080-1088.
59. Nicita F, Papetti L, Spalice A, et al. Epileptic nystagmus: description of a pediatric case with EEG correlation and SPECT findings. *J Neurol Sci* 2010;298:127-131.
60. Niedermeyer E, Hinchcliffe R. Vertigo and the Electroencephalogram. *Electroencephalogr Clin Neurophysiol* 1965;18:78-81.
61. Nsamba C. A comparative study of the aetiology of vertigo in the African. *The Journal of laryngology and otology* 1972;86:917-925.
62. Nyame PK. Symptomatology of temporal lobe epilepsy in Accra. *West Afr J Med* 1994;13:109-112.

63. Ojala M, Vaheri E, Larsen TA, Matikainen E, Juntunen J. Diagnostic value of electroencephalography and brainstem auditory evoked potentials in dizziness. *Acta Neurol Scand* 1988;78:518-523.
64. Palmiini A, Gloor P. The localizing value of auras in partial seizures: a prospective and retrospective study. *Neurology* 1992;42:801-808.
65. Pedersen E, Jepsen O. Epileptic vertigo. *Acta psychiatrica et neurologica Scandinavica Supplementum* 1956;108:301-310.
66. Peppercorn MA, Herzog AG. The spectrum of abdominal epilepsy in adults. *Am J Gastroenterol* 1989;84:1294-1296.
67. Pisano T, Marini C, Brovedani P, et al. Abnormal phonologic processing in familial lateral temporal lobe epilepsy due to a new LGI1 mutation. *Epilepsia* 2005;46:118-123.
68. Ravid S, Bienkowski R, Eviatar L. A simplified diagnostic approach to dizziness in children. *Pediatr Neurol* 2003;29:317-320.
69. Ravindran M. Focal cerebral dysrhythmia--presenting as headache: report of a case. *Clin Electroencephalogr* 1978;9:29-31.
70. Salanova V, Andermann F, Olivier A, Rasmussen T, Quesney LF. Occipital lobe epilepsy: electroclinical manifestations, electrocorticography, cortical stimulation and outcome in 42 patients treated between 1930 and 1991. *Surgery of occipital lobe epilepsy. Brain : a journal of neurology* 1992;115 ( Pt 6):1655-1680.
71. Salanova V, Andermann F, Rasmussen T, Olivier A, Quesney LF. Parietal lobe epilepsy. Clinical manifestations and outcome in 82 patients treated surgically between 1929 and 1988. *Brain* 1995;118 ( Pt 3):607-627.
72. Schneider RC, Calhoun HD, Crosby EC. Vertigo and rotational movement in cortical and subcortical lesions. *Journal of the neurological sciences* 1968;6:493-516.
73. Shrestha B. Acquired cerebral hemiatrophy: Dyke-Davidoff-Masson Syndrome - a case report. *Turkish neurosurgery* 2013;23:117-121.
74. Smith BH. Vestibular disturbances in epilepsy. *Neurology* 1960;10:465-469.
75. Soslow AR. Psychomotor seizures. *Annals of emergency medicine* 1984;13:290-292.
76. Specchio N, Kasteleijn-Nolst Trenite DG, Piccioli M, et al. Diagnosing photosensitive epilepsy: fancy new versus old fashioned techniques in patients with different epileptic syndromes. *Brain Dev* 2011;33:294-300.
77. Tartara A, Manni R, Mira E, Mevio E. Polygraphic study of vestibular stimulation in epileptic patients. *Rev Electroencephalogr Neurophysiol Clin* 1984;14:227-234.
78. Taylor DC, Lochery M. Temporal lobe epilepsy: origin and significance of simple and complex auras. *J Neurol Neurosurg Psychiatry* 1987;50:673-681.
79. Thibodeau LG, Ferrera PC. Nonconvulsive status epilepticus. *Am J Emerg Med* 1997;15:652-653.
80. Weber YG, Roesche J, Lerche H. Epileptic nystagmus: two case reports, clinical and pathophysiological review of the literature. *Journal of neurology* 2006;253:767-771.
81. Weintraub MI, Smith BH. Vertigo: epileptic manifestation of vertebral-basilar artery insufficiency. *N Y State J Med* 1969;69:1441-1446.
82. Wiest G, Zimprich F, Prayer D, Czech T, Serles W, Baumgartner C. Vestibular processing in human paramedian precuneus as shown by electrical cortical stimulation. *Neurology* 2004;62:473-475.
83. Winawer MR, Ottman R, Hauser WA, Pedley TA. Autosomal dominant partial epilepsy with auditory features: defining the phenotype. *Neurology* 2000;54:2173-2176.
