# Supplementary material
Source: PubMed Central journal article supplement (PMC4408281)
Supplement: supp_WNL.0000000000001474_Tables.pdf [file supp_WNL.0000000000001474_Tables.pdf]

**Table e-1: key information about the studies included**

| <b>sample size</b>                 | <i>adults</i>  | <i>children</i> | <i>mixed</i>   | <i>total</i>    |                          |               |                 |               |                |                 |
|------------------------------------|----------------|-----------------|----------------|-----------------|--------------------------|---------------|-----------------|---------------|----------------|-----------------|
| number of studies                  | 32             | 17              | 35             | 84              |                          |               |                 |               |                |                 |
| number of patients                 | 3132           | 687             | 7535           | 11354           |                          |               |                 |               |                |                 |
|                                    | only adults    |                 | only children  |                 | both adults and children |               |                 |               | all ages       |                 |
| <b>type of studies</b>             | <i>studies</i> | <i>patients</i> | <i>studies</i> | <i>patients</i> | <i>studies</i>           | <i>adults</i> | <i>children</i> | <i>age NR</i> | <i>studies</i> | <i>patients</i> |
| retrospective case series (CS) *   | 13             | 2264            | 8              | 568             | 31                       | 672           | 103             | 5317          | 52             | 8924            |
| prospective case series            | 2              | 116             | 0              | 0               | 3                        | 63            | 7               | 2039          | 5              | 2225            |
| prospective and retrospective CS † | 0              | 0               | 0              | 0               | 1                        | 0             | 0               | 179           | 1              | 179             |
| single case reports                | 17             | 17              | 9              | 9               | 0                        | 0             | 0               | 0             | 26             | 26              |

Abbreviations: NR = not reported

\* Two studies did not provide any specific information about the study type, however, based on the description of data acquisition, were likely retrospective.<sup>1,2</sup>

† This study includes two groups, one evaluated retrospectively and the other assessed prospectively.<sup>3</sup>

**Table e-2: drug treatment of EVD \***

|                               | <b>adults</b> | <b>children</b> | <b>age NR</b> | <b>total</b> |
|-------------------------------|---------------|-----------------|---------------|--------------|
| treatment reported †          | 27            | 29              | 54            | 110          |
| treatment successful          | 25            | 29              | 45            | 99           |
| success rate of treatment (%) | 92.6%         | 100%            | 83.3%         | 90.0%        |

\* ni-EVD and i-EVD cases pooled

† prescribed antiepileptic drugs (information available in 54 cases) included phenytoin (n=16), carbamazepine (n=12), others (n=6; one case each for benzodiazepines without further specification, barbitone, multiple antiepileptic drugs without further specification, mysoline, pregabalin and trimethadione), valproic acid (n=5), levetiracetam (n=4), phenobarbital (n=4), lamotrigine (n=3), oxcarbamazepine (n=2), topiramate (n=2).

**References**

1. Kim DW, Lee SK, Yun CH, et al. Parietal lobe epilepsy: the semiology, yield of diagnostic workup, and surgical outcome. *Epilepsia* 2004;45:641-649.
2. Nyame PK. Symptomatology of temporal lobe epilepsy in Accra. *West African journal of medicine* 1994;13:109-112.
3. Palmini A, Gloor P. The localizing value of auras in partial seizures: a prospective and retrospective study. *Neurology* 1992;42:801-808.
